# Supplementary material for: Highly active PdSb catalysts on porous carbon for electrochemical oxidation reactions of biomass-derived C1–C3 alcohols
Source: Royal Society of Chemistry journal article supplement (doi:10.1039/d2ma00277a), 2022-01-01
Supplement: d2ma00277a1.pdf [file d2ma00277a1.pdf]

# Supporting Information

## Highly Active PdSb Catalysts on Porous Carbon for Electrochemical Oxidations of Biomass-derived C1- C3 Alcohols

Daehee Jang<sup>a+</sup>, Hyunsu Han<sup>a+</sup>, Junbeom Maeng<sup>a</sup>, Wongeun Yoon<sup>a</sup>, Minseon Park<sup>a</sup> and Won Bae Kim<sup>a\*</sup>

<sup>a</sup> Department of Chemical Engineering, Pohang University of Science and Technology (POSTECH),  
77 Cheongam-ro, Nam-gu, Pohang, Gyeongbuk, 37673, Republic of Korea

---

\* Corresponding author  
Tel: 82-54-279-2397  
Fax: 82-54-279-5528  
E-Mail: [kimwb@postech.ac.kr](mailto:kimwb@postech.ac.kr)

[+] These authors contributed equally to this work.

**Table S1.** Pd and Sb contents in the Pd/PC and Pd<sub>x</sub>Sb<sub>y</sub>/PC catalysts.

| Samples                                   | Pd (wt%) <sup>a</sup> | Sb (wt%) <sup>a</sup> | Total (wt%) <sup>a</sup> |
|-------------------------------------------|-----------------------|-----------------------|--------------------------|
| Pd/PC                                     | 14.9                  | 0                     | 14.9                     |
| Pd <sub>0.93</sub> Sb <sub>0.07</sub> /PC | 13.8                  | 1.2                   | 15.0                     |
| Pd <sub>0.90</sub> Sb <sub>0.10</sub> /PC | 12.6                  | 1.4                   | 14.0                     |
| Pd <sub>0.85</sub> Sb <sub>0.15</sub> /PC | 12.1                  | 2.2                   | 14.3                     |

<sup>a</sup> Determined by ICP spectrometer**Table S2.** BET surface area and pore volume of the carbon materials used as support.

| Samples | BET surface area (m <sup>2</sup> g <sup>-1</sup> ) | Total pore volume (cm <sup>3</sup> g <sup>-1</sup> ) |
|---------|----------------------------------------------------|------------------------------------------------------|
| C       | 165                                                | 0.52                                                 |
| AC      | 215                                                | 0.63                                                 |
| PC      | 630                                                | 1.21                                                 |

**Table S3.** Electronic parameters of Pd/PC and Pd<sub>0.90</sub>Sb<sub>0.10</sub>/PC characterized by XPS and XANES analyses.

| Samples                                   | Pd 3d <sub>3/2</sub> (eV) <sup>a</sup> | Pd 3d <sub>5/2</sub> (eV) <sup>a</sup> | White line intensity (a.u.) <sup>b</sup> |
|-------------------------------------------|----------------------------------------|----------------------------------------|------------------------------------------|
| Pd/PC                                     | 340.88                                 | 335.58                                 | 0.947                                    |
| Pd <sub>0.90</sub> Sb <sub>0.10</sub> /PC | 340.58                                 | 335.28                                 | 0.952                                    |

Determined by <sup>a</sup> XPS and <sup>b</sup> Pd K-edge XANES spectra

**Table S4.** EXAFS fitting results of Pd K-edge for Pd.

| Samples                                   | shell | CN    | R (Å) | $\Delta E_0$ (eV) | $\sigma^2$ (Å <sup>2</sup> ) |
|-------------------------------------------|-------|-------|-------|-------------------|------------------------------|
| Pd <sub>0.90</sub> Sb <sub>0.10</sub> /PC | Pd-O  | 1.04  | 2.021 | 4.12              | 0.0032                       |
|                                           | Pd-Pd | 5.95  | 2.744 | -2.74             | 0.0049                       |
|                                           | Pd-Pd | 1.43  | 3.223 | -2.74             | 0.0080                       |
| Pd/PC                                     | Pd-O  | 0.89  | 2.024 | 6.323             | 0.0060                       |
|                                           | Pd-Pd | 6.64  | 2.737 | -3.48             | 0.0043                       |
|                                           | Pd-Pd | 1.19  | 3.205 | -3.48             | 0.0015                       |
| PdO                                       | Pd-O  | 4.00  | 2.019 | 3.29              | 0.0031                       |
|                                           | Pd-Pd | 4.00  | 3.108 | 9.32              | 0.0025                       |
| Pd foil                                   | Pd-Pd | 12.00 | 2.738 | -0.46             | 0.0044                       |

**Table S5.** Current density and mass activity of commercial Pd/C, Pd/AC, Pd/PC and Pd<sub>x</sub>Sb<sub>y</sub>/PC in ethanol oxidation.

| Samples                                   | Current density (mA cm <sup>-2</sup> ) | Mass activity (A mg <sub>Pd</sub> <sup>-1</sup> ) |
|-------------------------------------------|----------------------------------------|---------------------------------------------------|
| Pd/C                                      | 109.8                                  | 1.630                                             |
| Pd/AC                                     | 116.4                                  | 1.728                                             |
| Pd/PC                                     | 139.8                                  | 2.787                                             |
| Pd <sub>0.93</sub> Sb <sub>0.07</sub> /PC | 145.1                                  | 3.138                                             |
| Pd <sub>0.90</sub> Sb <sub>0.10</sub> /PC | 180.1                                  | 4.244                                             |
| Pd <sub>0.85</sub> Sb <sub>0.15</sub> /PC | 143.1                                  | 3.400                                             |

**Table S6.** Comparison of EOR performances over Pd based catalysts.

| Catalyst                                             | Electrolyte             | Mass activity<br>(A mg <sub>Pd</sub> <sup>-1</sup> ) | Ref.      |
|------------------------------------------------------|-------------------------|------------------------------------------------------|-----------|
| Pd <sub>0.90</sub> Sb <sub>0.10</sub> /PC            | 1.0 M EtOH + 1.0 M KOH  | 4.24                                                 | This work |
| Pd/a-SrRuO <sub>3</sub>                              | 1.0 M EtOH + 1.0 M KOH  | 4.00                                                 | S1        |
| Pd <sub>40</sub> Ni <sub>43</sub> P <sub>17</sub>    | 1.0 M EtOH + 1.0 M NaOH | 4.95                                                 | S2        |
| PdCo@NPNCs                                           | 1.0 M EtOH + 1.0 M KOH  | 1.33                                                 | S3        |
| Pd/TiO <sub>2</sub> -NC                              | 1.0 M EtOH + 1.0 M KOH  | 2.59                                                 | S4        |
| Au <sub>80</sub> @Pd <sub>20</sub> /C                | 0.5 M EtOH + 0.5 M KOH  | 0.83                                                 | S5        |
| PAG                                                  | 1.0 M EtOH + 0.5 M NaOH | 3.69                                                 | S6        |
| Pd/Ni(OH) <sub>2</sub> /rGO                          | 1.0 M EtOH + 1.0 M KOH  | 1.55                                                 | S7        |
| Pd <sub>2</sub> Ru/C                                 | 1.0 M EtOH + 1.0 M NaOH | 2.99                                                 | S8        |
| PdCu <sub>2</sub>                                    | 1.0 M EtOH + 1.0 M KOH  | 1.60                                                 | S9        |
| Pd/Ru                                                | 1.0 M EtOH + 1.0 M KOH  | 1.15                                                 | S10       |
| Pd/C promoted with CaSiO <sub>3</sub>                | 1.0 M EtOH + 1.0 M KOH  | 1.5                                                  | S11       |
| PtPd(1:3)/RGO/GC                                     | 1.0 M EtOH + 1.0 M KOH  | 1.50                                                 | S12       |
| PdC-MoC                                              | 1.0 M EtOH + 1.0 M KOH  | 3.72                                                 | S13       |
| Au@Pd NRs                                            | 1.0 M EtOH + 1.0 M KOH  | 2.92                                                 | S14       |
| IM-Pd <sub>3</sub> Pb NNs                            | 1.0 M EtOH + 1.0 M KOH  | 3.2                                                  | S15       |
| Pd <sub>1</sub> Ru <sub>0.69</sub> /TiO <sub>2</sub> | 1.0 M EtOH + 1.0 M NaOH | 2.70                                                 | S16       |
| CNT/Pd                                               | 1.0 M EtOH + 1.0 M KOH  | 2.94                                                 | S17       |

**Table S7.** Mass activity and onset potential of commercial Pd/C, Pd/PC and Pd<sub>0.90</sub>Sb<sub>0.10</sub>/PC in methanol, ethanol, ethylene glycol and glycerol oxidation.

| Samples                                   |                                                   | Methanol | Ethanol | Ethylene glycol | Glycerol |
|-------------------------------------------|---------------------------------------------------|----------|---------|-----------------|----------|
| Pd/C                                      | Mass activity (A mg <sub>Pd</sub> <sup>-1</sup> ) | 1.13     | 1.63    | 1.25            | 1.39     |
|                                           | Onset potential (V vs SCE) <sup>a</sup>           | -0.412   | -0.457  | -0.516          | -0.369   |
| Pd/PC                                     | Mass activity (A mg <sub>Pd</sub> <sup>-1</sup> ) | 1.55     | 2.79    | 2.01            | 1.95     |
|                                           | Onset potential (V vs SCE) <sup>a</sup>           | -0.408   | -0.509  | -0.585          | -0.362   |
| Pd <sub>0.90</sub> Sb <sub>0.10</sub> /PC | Mass activity (A mg <sub>Pd</sub> <sup>-1</sup> ) | 2.51     | 4.24    | 3.18            | 3.22     |
|                                           | Onset potential (V vs SCE) <sup>a</sup>           | -0.460   | -0.544  | -0.629          | -0.398   |

<sup>a</sup> The onset potential was determined at 0.3 A mg<sub>Pd</sub><sup>-1</sup>.

**Table S8.** Electrochemical impedance parameters of commercial Pd/C, Pd/PC and Pd<sub>x</sub>Sb<sub>y</sub>/PC in 1.0 M KOH + 1.0 M ethanol solution at - 0.3 V vs. SCE.

| Samples                                   | R <sub>s</sub> (Ω) | R <sub>ct</sub> (Ω) | CPE (F cm <sup>-2</sup> ) |
|-------------------------------------------|--------------------|---------------------|---------------------------|
| Pd/C                                      | 6.53               | 211.25              | 0.000385                  |
| Pd/PC                                     | 7.05               | 169.76              | 0.000418                  |
| Pd <sub>0.93</sub> Sb <sub>0.07</sub> /PC | 6.85               | 132.44              | 0.002561                  |
| Pd <sub>0.90</sub> Sb <sub>0.10</sub> /PC | 7.28               | 72.14               | 0.001349                  |
| Pd <sub>0.85</sub> Sb <sub>0.15</sub> /PC | 7.22               | 92.28               | 0.001226                  |

## Reference for Table S7.

- [S1] X. Wu, J. He, M. Zhang, Z. Liu, S. Zhang, Y. Zhao, T. Li, F. Zhang, Z. Peng, N. Cheng, J. Zhang, X. Wen, Y. Xie, H. Tian, L. Cao, L. Bi, Y. Du, H. Zhang, J. Cheng, X. An, Y. Lei, H. Shen, J. Gan, X. Zu, S. Li, L. Qiao, *Nano Energy* 67 (2020) 104247.
- [S2] L. Chen, L. Lu, H. Zhu, Y. Chen, Y. Huang, Y. Li, L. Wang, *Nat. Commun.* 8 (2017) 14136.
- [S3] Z. Zhang, S. Liu, X. Tian, J. Wang, P. Xu, F. Xiao, S. Wang, *J. Mater. Chem. A* 5 (2017) 10876-10884.
- [S4] Y.-H. Qin, Z.-Y. Xiong, J. Ma, L. Yang, Z. Wu, W. Feng, T.-L. Wang, W.-G. Wang, C.-W. Wang, *Int. J. Hydrogen Energy* 42 (2017) 1103-1112.
- [S5] L. S. R. Silva, C. V. S. Almeida, C. T. Meneses, E. A. Batista, S. F. Santos, K. I. B. Eguiluz, G. R. Salazar-Banda, *Appl. Catal. B: Environ.* 251 (2019) 313-325.
- [S6] L. T. Tran, Q. M. Nguyen, M. D. Nguyen, H. N. Thi Le, T. T. Nguyen, T. H. Thi Vu, *Int. J. Hydrogen Energy* 43 (2018) 20563-20572.
- [S7] W. Huang, X.-Y. Ma, H. Wang, R. Feng, J. Zhou, P. N. Duchesne, P. Zhang, F. Chen, N. Han, F. Zhao, J. Zhou, W.-B. Cai, Y. Li, *Adv. Mater.* 29 (2017) 1703057.
- [S8] J. Guo, R. Chen, F.-C. Zhu, S.-G. Sun, H. M. Villullas, *Appl. Catal. B: Environ.* 224 (2018) 602-611.
- [S9] J. Xue, G. Han, W. Ye, Y. Sang, H. Li, P. Guo, X. S. Zhao, *ACS Appl. Mater. Interfaces* 8 (2016) 34497-34505.
- [S10] K. Zhang, D. Bin, B. Yang, C. Wang, F. Ren, Y. Du, *Nanoscale* 7 (2015) 12445-12451.
- [S11] H. Chen, Y. Huang, D. Tang, T. Zhang, Y. Wang, *Electrochim. Acta* 158 (2015) 18-23.
- [S12] F. Ren, H. Wang, C. Zhai, M. Zhu, R. Yue, Y. Du, P. Yang, J. Xu, W. Lu, *ACS Appl. Mater. Interfaces* 6 (2014) 3607-3614.
- [S13] Z. Yan, J. Xie, P. K. Shen, M. Zhang, Y. Zhang, M. Chen, *Electrochim. Acta* 108 (2013) 644-650.
- [S14] Y. Chen, Z. Fan, Z. Luo, X. Liu, Z. Lai, B. Li, Y. Zong, L. Gu, H. Zhang, *Adv. Mater.* 29 (2017) 1701331.
- [S15] Q. Shi, C. Zhu, C. Bi, H. Xia, M. H. Engelhard, D. Du, Y. Lin, *J. Mater. Chem. A* 5 (2017) 23952-23959.
- [S16] X. Liu, L. Ning, M. Deng, J. Wu, A. Zhu, Q. Zhang, Q. Liu, *Nanoscale* 11 (2019) 3311-3317.
- [S17] M. S. Ahmed, S. Jeon, *J. Power Sources* 282 (2015) 479-488.

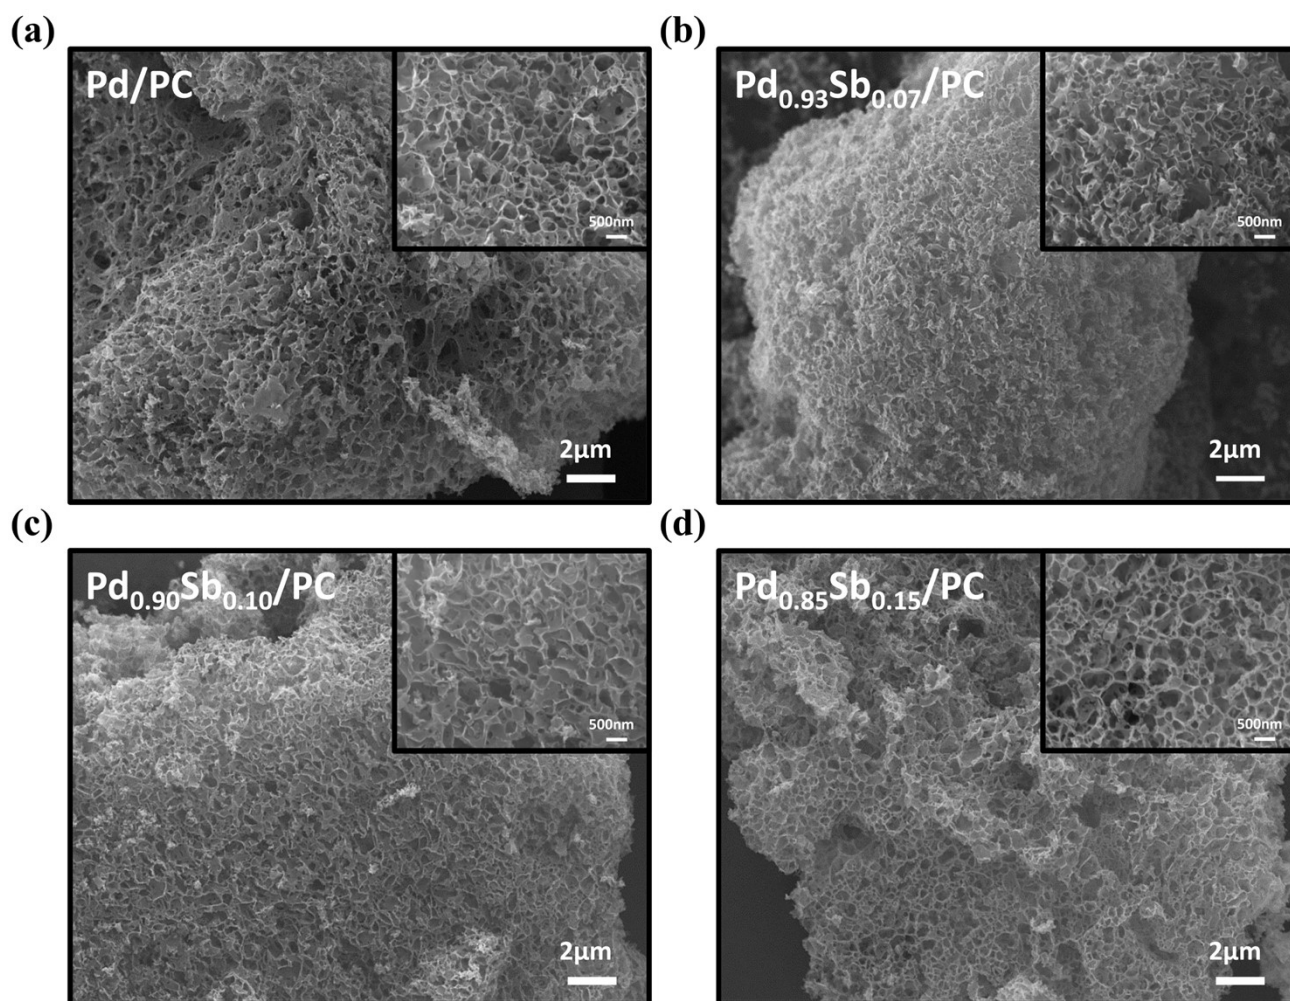

**Fig. S1.** SEM images of (a) Pd/PC, (b) Pd<sub>0.93</sub>Sb<sub>0.07</sub>/PC, (c) Pd<sub>0.90</sub>Sb<sub>0.10</sub>/PC and (d) Pd<sub>0.85</sub>Sb<sub>0.15</sub>/PC.



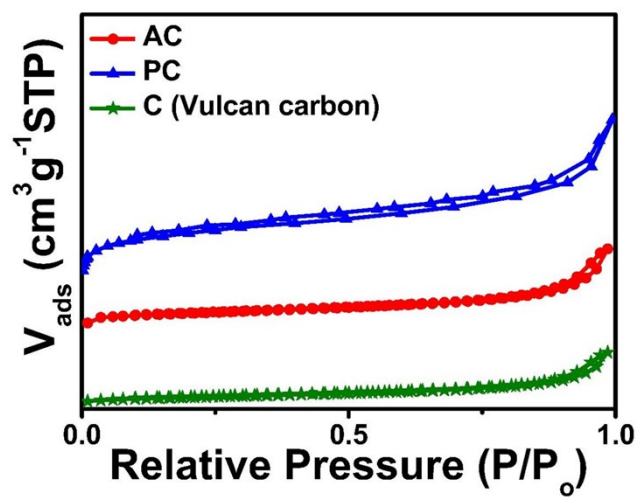

**Fig. S2.**  $\text{N}_2$  adsorption/desorption isotherms for C, AC and PC

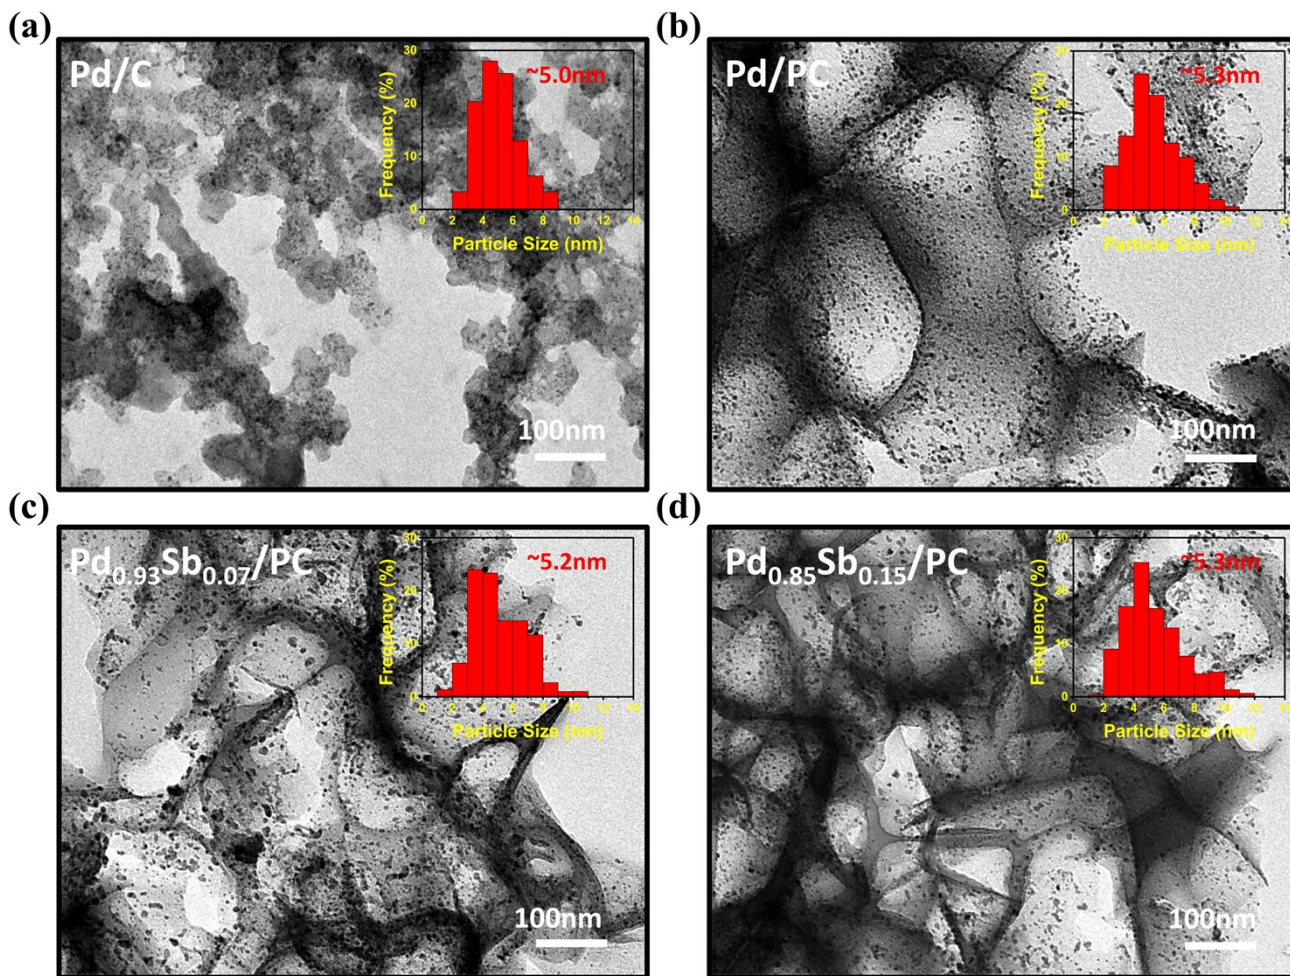

**Fig. S3.** TEM images and particle size distribution of (a) Pd/C, (b) Pd/PC, (c) Pd<sub>0.93</sub>Sb<sub>0.07</sub>/PC and (d) Pd<sub>0.85</sub>Sb<sub>0.15</sub>/PC.

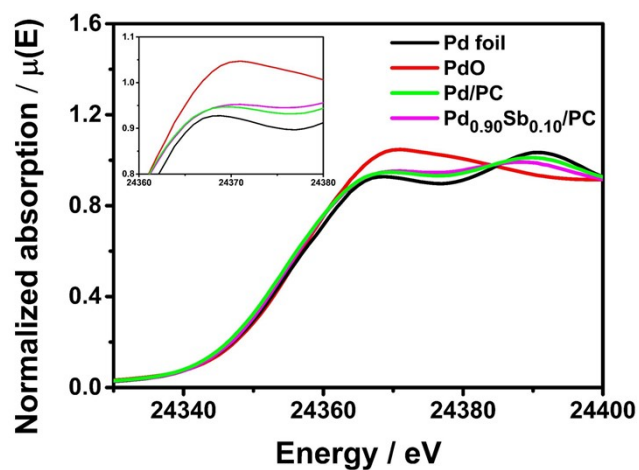

**Fig. S4.** Pd K-edge XANES spectra for the Pd/PC and Pd<sub>0.90</sub>Sb<sub>0.10</sub>/PC with Pd foil and PdO as references. The inset shows a magnified image for white line intensity.

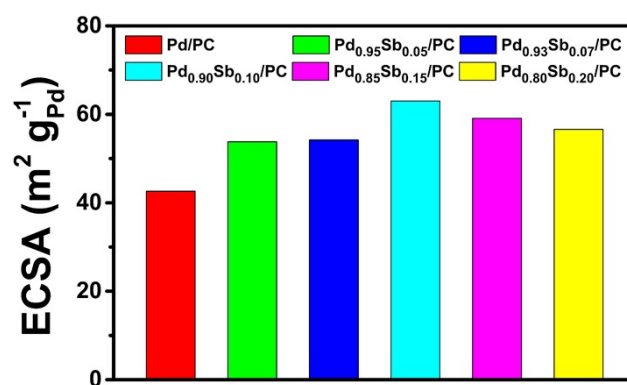

**Fig. S5.** The values of ECSA for Pd/PC and Pd<sub>x</sub>Sb<sub>y</sub>/PC.

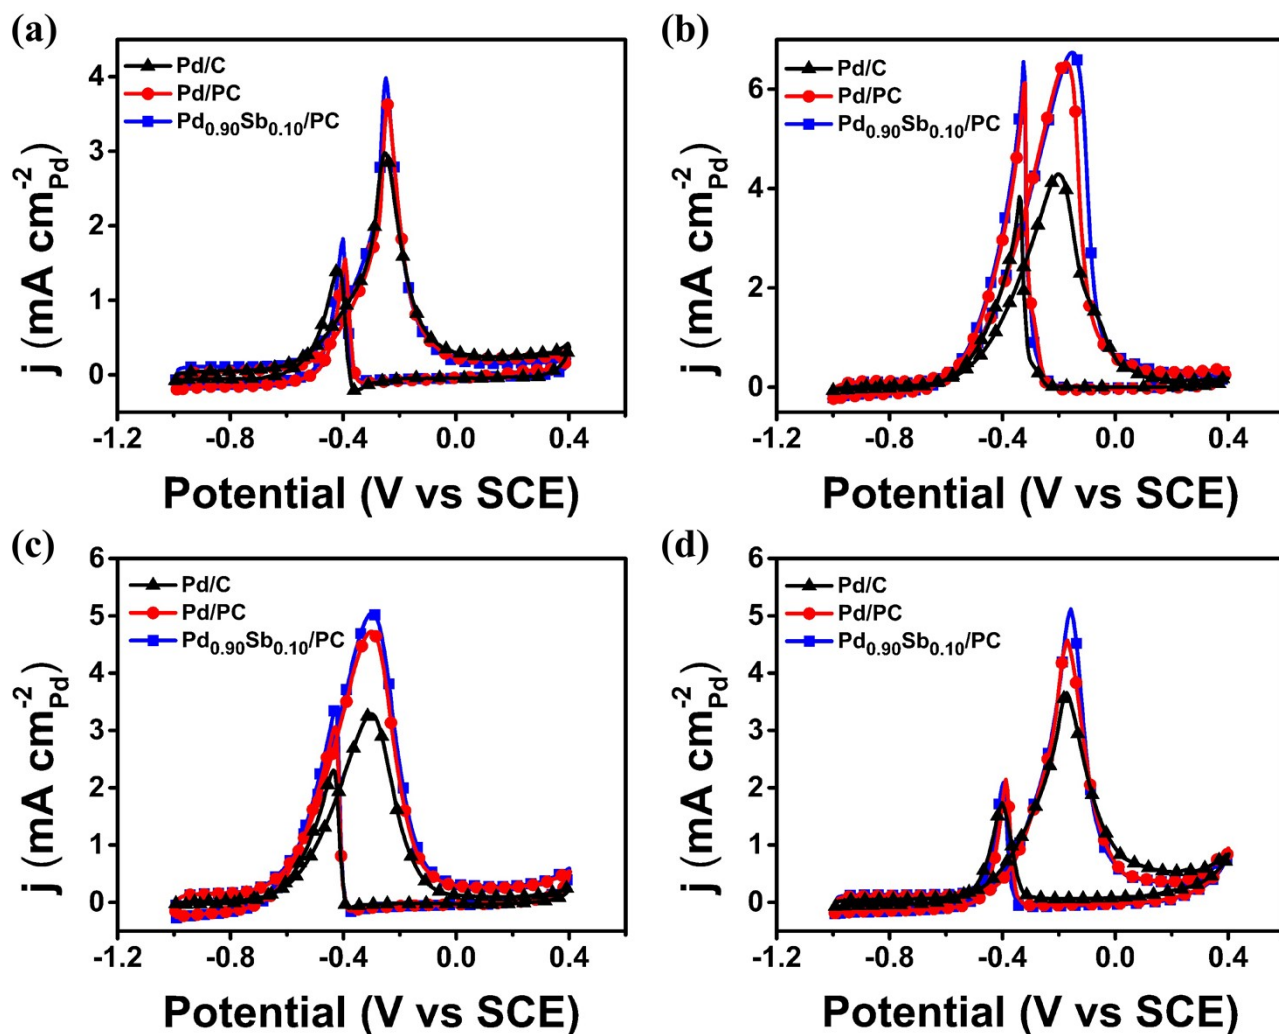

**Fig. S6.** Specific activities of commercial Pd/C, Pd/PC and Pd<sub>0.90</sub>Sb<sub>0.10</sub>/PC in 1.0 M KOH solutions containing (a) methanol, (b) ethanol, (c) ethylene glycol and (d) glycerol, respectively.

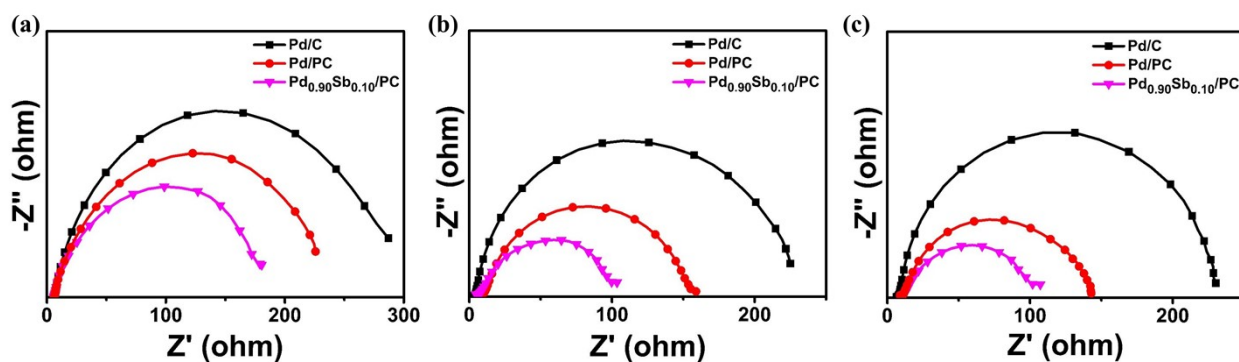

**Fig. S7.** Nyquist plots at - 0.30 V (vs. SCE) in (a) 1.0 M KOH + 1.0 M methanol solution, (b) 1.0 M KOH + 1.0 M ethylene glycol solution and (c) 1.0 M KOH + 1.0 M glycerol solution.

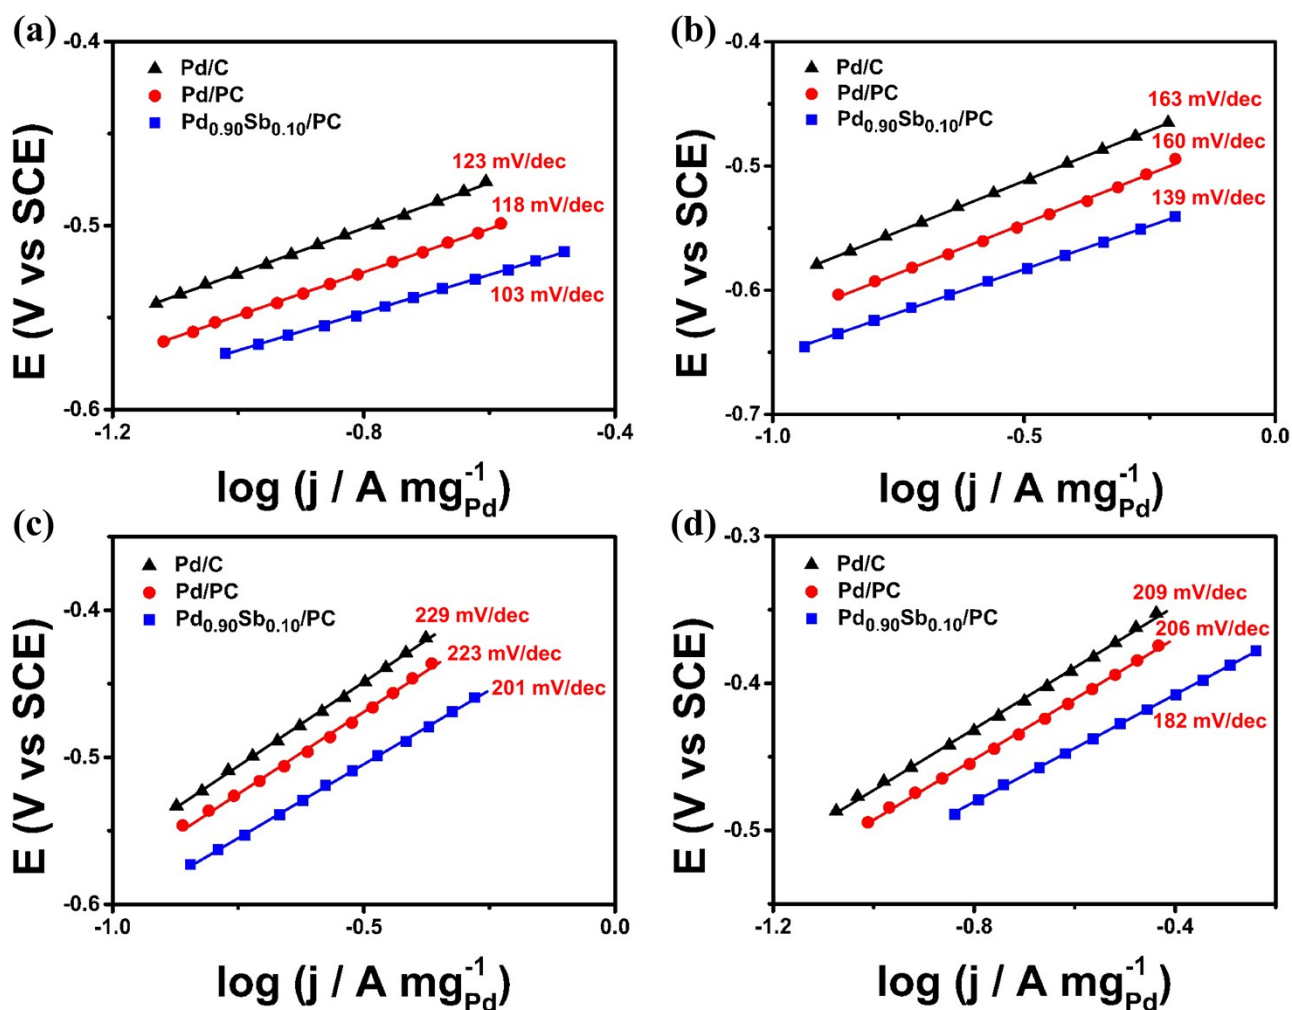

**Fig. S8.** Tafel plots of Pd/C, Pd/PC and Pd<sub>0.90</sub>Sb<sub>0.10</sub>/PC in 1.0 M KOH solutions containing (a) methanol, (b) ethanol, (c) ethylene glycol and (d) glycerol, respectively.

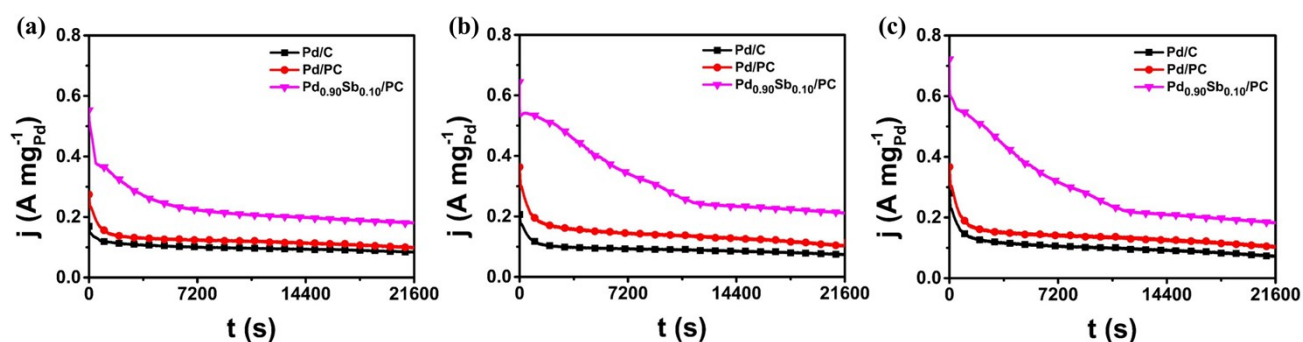

**Fig. S9.** Chronoamperometric measurements at  $-0.35$  V (vs. SCE) in (a) 1.0 M KOH + 1.0 M methanol solution, (b) 1.0 M KOH + 1.0 M ethylene glycol solution and (c) 1.0 M KOH + 1.0 M glycerol solution.
